# Supplementary material
Source: Springer Nature journal article supplement (https://www.springermedizin.de/resource/supplementary/13023_2009_179_MOESM2_ESM.pdf/9641800)
Supplement: MOESM2 [file 9641800]

# Systemic involvement

## (hepato) Splenomegaly

- Absent in ~15% of cases
- Age of onset is variable
  - always before neurological signs
- May regress with age

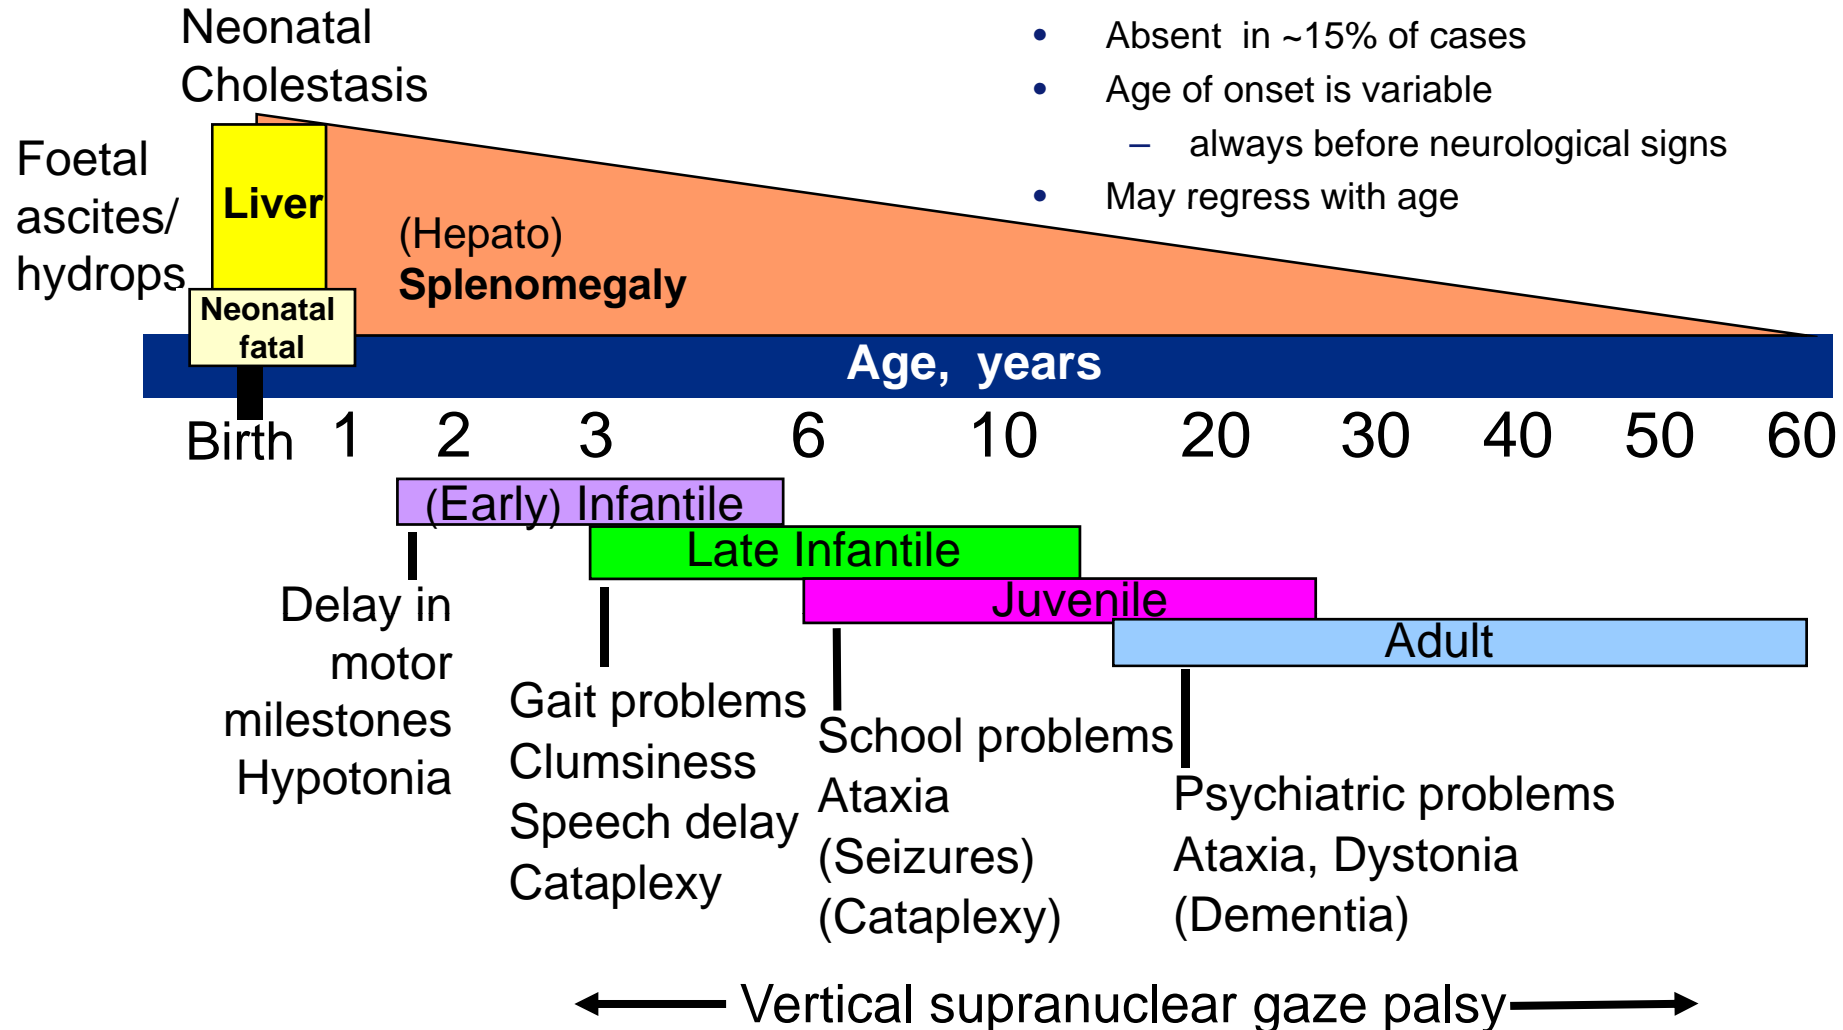

# Neurological involvement
